# Supplementary material
Source: MDPI journal article supplement (https://www.mdpi.com/2073-4395/13/7/1784)
Supplement: s1 [file s1]

**Table S1.** Plant materials assessed for salinity tolerance.

| Clone/variety | Species                       | Accession number |
|---------------|-------------------------------|------------------|
| BLB1C         | <i>Solanum bulbocastanum</i>  | PI275190         |
| CMM1T         | <i>Solanum commersonii</i>    | PI243503         |
| CMM6-6        | <i>Solanum commersonii</i>    | PI590886         |
| CHM1B         | <i>Solanum chomatophilum</i>  | PI 310991        |
| MLT1A         | <i>Solanum multidissectum</i> | 8MLT-M1          |
| PNT04         | <i>Solanum pinnactisectum</i> | PI347766         |
| DM            | <i>Solanum phureja</i>        | DM1-3-516-R44    |
| 85/16         | <i>Solanum phureja</i>        | P1.22            |
| Désirée       | <i>Solanum tuberosum</i>      | -                |
| Tasso         | <i>Solanum tuberosum</i>      | -                |

**Table S2:** Salinity tolerance index (STI) derived from 12 parameters measured on nine clones grown at three NaCl concentrations (40, 60, 120 mM). Leaf number (LN), Root number (RN), Shoots fresh weight (SFW), Shoots dry weight (SDW), Roots fresh weight (RFW), Roots dry weight (RDW), day of shoot (DS), Day of root (DR), Total fresh weight (TFW), Total dry weight (TDW), Shoot height (SH), Root length (RL).

| CLONES        | LN   | RN   | SFW  | SDW  | RFW  | RDW  | DS   | DR   | TFW  | TDW  | SH   | RL   | Mean +/- | St. Dev. |
|---------------|------|------|------|------|------|------|------|------|------|------|------|------|----------|----------|
| BLB1C_40      | 0.84 | 0.88 | 0.62 | 0.89 | 0.61 | 0.63 | 0.99 | 0.99 | 0.62 | 0.78 | 0.50 | 0.56 | 0.74 +/- | 0.17     |
| BLB1C_60      | 1.20 | 0.63 | 0.94 | 1.09 | 0.66 | 0.67 | 1.00 | 0.93 | 0.81 | 0.91 | 0.58 | 0.57 | 0.83 +/- | 0.21     |
| BLB1C_120     | 0.00 | 0.15 | 0.22 | 0.33 | 0.01 | 0.05 | 0.63 | 0.38 | 0.13 | 0.21 | 0.12 | 0.11 | 0.19 +/- | 0.18     |
| CHM1B_40      | 0.50 | 0.42 | 0.59 | 0.67 | 0.50 | 0.53 | 1.03 | 0.98 | 0.56 | 0.63 | 0.74 | 1.12 | 0.69 +/- | 0.23     |
| CHM1B_60      | 0.26 | 1.52 | 0.56 | 0.69 | 0.45 | 0.45 | 0.95 | 0.88 | 0.52 | 0.62 | 0.43 | 1.05 | 0.70 +/- | 0.35     |
| CHM1B_120     | 0.04 | 0.00 | 0.03 | 0.05 | 0.00 | 0.00 | 0.34 | 0.00 | 0.02 | 0.03 | 0.03 | 0.00 | 0.05 +/- | 0.10     |
| CMM1T_40      | 1.01 | 0.75 | 1.40 | 1.10 | 0.95 | 0.74 | 0.98 | 0.93 | 1.24 | 0.99 | 0.96 | 1.05 | 1.01 +/- | 0.18     |
| CMM1T_60      | 0.99 | 0.73 | 1.32 | 1.05 | 0.82 | 0.82 | 0.98 | 0.95 | 1.15 | 0.98 | 0.93 | 0.80 | 0.96 +/- | 0.16     |
| CMM1T_120     | 0.15 | 0.14 | 0.34 | 0.29 | 0.02 | 0.09 | 0.82 | 0.43 | 0.23 | 0.23 | 0.22 | 0.05 | 0.25 +/- | 0.21     |
| CMM6-6_40     | 0.83 | 0.63 | 0.80 | 0.67 | 0.70 | 0.64 | 1.00 | 1.01 | 0.76 | 0.66 | 0.73 | 1.18 | 0.80 +/- | 0.17     |
| CMM6-6_60     | 0.67 | 0.53 | 1.07 | 0.92 | 0.92 | 1.00 | 0.99 | 1.00 | 1.01 | 0.95 | 0.62 | 1.25 | 0.91 +/- | 0.21     |
| CMM6-6_120    | 0.32 | 0.16 | 0.51 | 0.54 | 0.33 | 0.54 | 0.91 | 0.60 | 0.44 | 0.54 | 0.35 | 0.36 | 0.47 +/- | 0.19     |
| DESIREE_40    | 1.05 | 0.61 | 0.67 | 0.68 | 0.61 | 0.57 | 1.00 | 0.91 | 0.65 | 0.65 | 0.92 | 1.19 | 0.79 +/- | 0.21     |
| DESIREE_60    | 1.02 | 0.79 | 1.01 | 0.97 | 0.75 | 0.76 | 0.99 | 0.98 | 0.95 | 0.91 | 0.95 | 1.29 | 0.95 +/- | 0.14     |
| DESIREE_120   | 0.18 | 0.00 | 0.22 | 0.29 | 0.00 | 0.00 | 0.97 | 0.31 | 0.17 | 0.21 | 0.10 | 0.00 | 0.20 +/- | 0.27     |
| S.P.DM_40     | 0.68 | 0.66 | 0.44 | 0.50 | 0.19 | 0.27 | 1.00 | 0.48 | 0.39 | 0.45 | 0.45 | 0.32 | 0.49 +/- | 0.21     |
| S.P.DM_60     | 0.50 | 0.24 | 0.62 | 0.72 | 0.70 | 0.57 | 1.00 | 0.62 | 0.64 | 0.69 | 0.27 | 0.52 | 0.59 +/- | 0.20     |
| S.P.DM_120    | 0.16 | 0.00 | 0.30 | 0.32 | 0.00 | 0.00 | 0.98 | 1.44 | 0.25 | 0.25 | 0.07 | 0.00 | 0.31 +/- | 0.45     |
| MLT1A_40      | 1.00 | 1.02 | 0.88 | 0.76 | 0.96 | 0.90 | 1.00 | 0.99 | 0.90 | 0.78 | 0.83 | 1.01 | 0.92 +/- | 0.09     |
| MLT1A_60      | 1.06 | 1.32 | 1.26 | 1.14 | 1.04 | 1.18 | 1.00 | 0.99 | 1.21 | 1.15 | 0.74 | 0.93 | 1.08 +/- | 0.16     |
| MLT1A_120     | 0.41 | 0.45 | 0.53 | 0.58 | 0.14 | 0.42 | 0.96 | 0.52 | 0.44 | 0.55 | 0.16 | 0.34 | 0.46 +/- | 0.21     |
| S.P.85/16_40  | 0.67 | 0.71 | 0.52 | 0.58 | 0.35 | 0.35 | 1.00 | 0.97 | 0.48 | 0.51 | 0.84 | 0.87 | 0.65 +/- | 0.23     |
| S.P.85/16_60  | 0.44 | 0.53 | 0.29 | 0.35 | 0.30 | 0.39 | 0.99 | 0.72 | 0.29 | 0.36 | 0.35 | 0.74 | 0.48 +/- | 0.22     |
| S.P.85/16_120 | 0.22 | 0.00 | 0.06 | 0.09 | 0.00 | 0.00 | 0.84 | 0.00 | 0.04 | 0.06 | 0.10 | 0.00 | 0.12 +/- | 0.24     |
| TASSO_40      | 0.88 | 0.68 | 0.65 | 0.68 | 0.49 | 0.51 | 0.99 | 0.97 | 0.56 | 0.60 | 0.88 | 1.09 | 0.75 +/- | 0.21     |
| TASSO_60      | 0.68 | 0.58 | 0.55 | 0.65 | 0.34 | 0.38 | 1.00 | 0.89 | 0.44 | 0.52 | 0.49 | 1.11 | 0.64 +/- | 0.24     |
| TASSO_120     | 0.11 | 0.00 | 0.13 | 0.20 | 0.02 | 0.02 | 0.89 | 0.08 | 0.07 | 0.11 | 0.10 | 0.07 | 0.15 +/- | 0.24     |

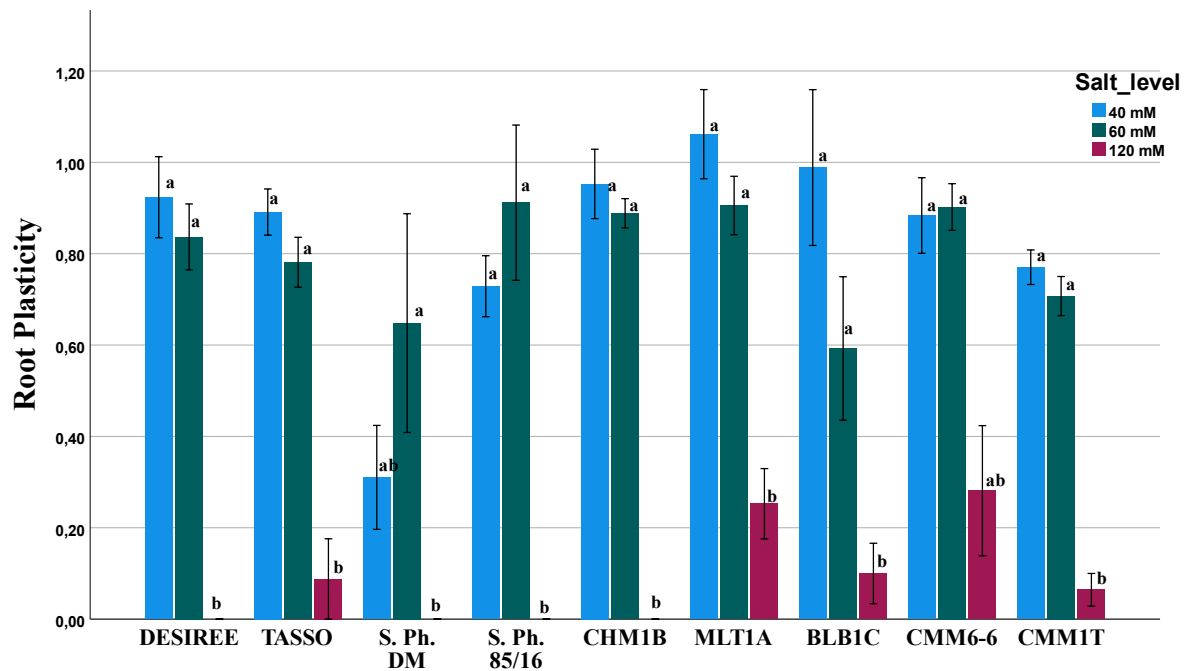

**Figure S1:** Root Plasticity of nine clones for each salt concentration, calculated as the ratio between the trait performance at 40, 60, 120 mM over the trait performance at 0 mM NaCl. Outliers are identified by different shapes and colors (blue dot = 40 mM; green dot = 60 mM; purple asterisk = 120 mM). Means denoted by the same letter did not significantly differ at  $p < 0.05$  according to the Duncan's multiple range test.

**Table S3:** The linear regression model was constructed between Root Plasticity data and the EI values of all nine clones at each salinity level tested.

| Summary of the model |                    |                |                        |           |
|----------------------|--------------------|----------------|------------------------|-----------|
| Model                | R                  | R <sup>2</sup> | R <sup>2</sup> adapted | Std. err. |
| 1                    | 0.866 <sup>a</sup> | 0.750          | 0.740                  | 1.84999   |

a. Predictors: (constant), Plasticity

| ANOVA <sup>a</sup> |            |                |    |                |        |                    |
|--------------------|------------|----------------|----|----------------|--------|--------------------|
| Model              |            | sum of squares | df | average square | F      | Sign.              |
| 1                  | regression | 256.689        | 1  | 256.689        | 75.001 | <.001 <sup>b</sup> |
|                    | residual   | 85.562         | 25 | 3.422          |        |                    |
|                    | total      | 342.250        | 26 |                |        |                    |

a. dependent variable: Evaluation Index

b. Predictors: (constant), Plasticity

| Coefficients <sup>a</sup> |            |                               |           |                           |       |       |
|---------------------------|------------|-------------------------------|-----------|---------------------------|-------|-------|
| Model                     |            | Coefficients not standardised |           | Standardised coefficients |       |       |
|                           |            | B                             | Std. err. | Beta                      | t     | Sign. |
| 1                         | (Constant) | 2.349                         | .663      |                           | 3.544 | .002  |
|                           | Plasticity | 8.316                         | .960      | .866                      | 8.660 | <.001 |

a. dependent variable: Evaluation Index

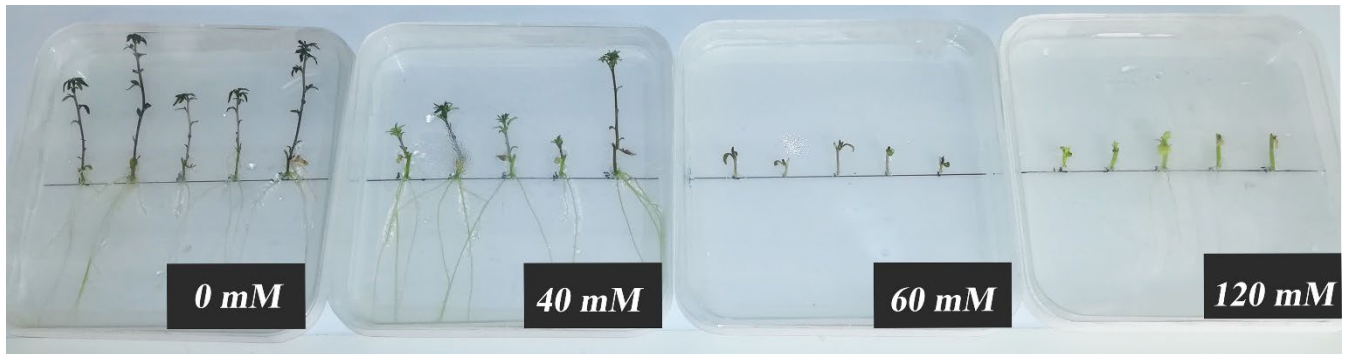

**Figure S2:** Plants after 30 days of growth laid out in plastic squared Petri dishes 12x12cm with 50 ml of MS medium containing 0, 40, 60, and 120 mM of NaCl.
